# Supplementary material
Source: publisher figshare collection journal article supplement (https://acs.figshare.com/ndownloader/files/9397903)
Supplement: Supplementary file 1 [file 9397903]

## Sheet: Sheet1
toluene					o-MNT					p-MNT					2,4-DNT					2,6-DNT					TNT					TNT without D-3					TNT with D-3
atom	x	y	z		atom	x	y	z		atom	x	y	z		atom	x	y	z		atom	x	y	z		atom	x	y	z		atom	x	y	z		atom	x	y	z
C	-6.11149	6.42585	1e-06		C	0.143855	-0.12132	-0.184955		C	0.241774	-0.039317	-0.169004		C	0.234664	-0.083199	-0.143462		C	0.268077	-0.188894	-0.17044		C	0.821468	-0.612605	-0.082481		C	0.821468	-0.612605	-0.082481		C	0.821468	-0.612605	-0.082481
C	-6.10956	4.9852	-0.123974		C	1.58805	-0.099757	-0.183798		C	1.68682	-0.019419	-0.155742		C	1.67886	-0.036896	-0.122908		C	1.70863	-0.116138	-0.141745		C	0.796311	-2.04826	-0.051335		C	0.796311	-2.04826	-0.051335		C	0.796311	-2.04826	-0.051335
C	-4.87216	4.27923	-0.182321		C	2.27788	1.1487	-0.179622		C	2.3793	1.22702	-0.155582		C	2.34859	1.22019	-0.157173		C	2.35354	1.15464	-0.149392		C	2.01124	-2.77814	-0.04792		C	2.01124	-2.77814	-0.04792		C	2.01124	-2.77814	-0.04792
C	-4.87204	2.85503	-0.276786		C	3.70531	1.17049	-0.159189		C	3.80644	1.24636	-0.126783		C	3.77498	1.2658	-0.124249		C	3.77867	1.22772	-0.105404		C	1.98432	-4.20239	-0.03496		C	1.98432	-4.20239	-0.03496		C	1.98432	-4.20239	-0.03496
C	-3.63275	6.42422	0.017543		C	0.103208	2.35182	-0.151128		C	0.207794	2.43414	-0.143459		C	0.158488	2.38733	-0.198567		C	0.138892	2.27851	-0.188352		C	3.284	-0.658648	-0.057004		C	3.284	-0.658648	-0.057004		C	3.284	-0.658648	-0.057004
C	-3.63435	4.98358	-0.107016		C	1.54918	2.37335	-0.150593		C	1.65284	2.4537	-0.130694		C	1.60067	2.43323	-0.175439		C	1.58205	2.35181	-0.160184		C	3.25534	-2.09867	-0.036163		C	3.25534	-2.09867	-0.036163		C	3.25534	-2.09867	-0.036163
C	-2.40506	4.27341	-0.153912		C	2.24134	3.61297	-0.109595		C	2.34687	3.69222	-0.094396		C	2.27146	3.68438	-0.182497		C	2.22814	3.61637	-0.131668		C	4.47152	-2.82612	-0.027343		C	4.47152	-2.82612	-0.027343		C	4.47152	-2.82612	-0.027343
C	-2.41138	2.85089	-0.26914		C	3.66706	3.62938	-0.108796		C	3.77282	3.7059	-0.091519		C	3.69618	3.72402	-0.175161		C	3.65137	3.68409	-0.107081		C	4.44219	-4.2507	-0.037833		C	4.44219	-4.2507	-0.037833		C	4.44219	-4.2507	-0.037833
C	-1.18005	6.40384	0.041711		C	0.080448	4.80349	-0.037874		C	0.188329	4.8855	-0.031033		C	0.091339	4.83919	-0.180635		C	0.024254	4.73103	-0.125395		C	5.74543	-0.708203	0.01867		C	5.74543	-0.708203	0.01867		C	5.74543	-0.708203	0.01867
C	-1.17659	4.97272	-0.08353		C	1.51688	4.82902	-0.057696		C	1.62489	4.90897	-0.052177		C	1.52697	4.88715	-0.191062		C	1.45927	4.80617	-0.119717		C	5.71428	-2.14433	-0.009845		C	5.71428	-2.14433	-0.009845		C	5.71428	-2.14433	-0.009845
C	0.051356	4.26597	-0.137596		C	2.20685	6.06705	-0.028671		C	2.31649	6.14629	-0.033354		C	2.19557	6.13623	-0.214752		C	2.1042	6.06808	-0.103923		C	6.92802	-2.87464	-0.027511		C	6.92802	-2.87464	-0.027511		C	6.92802	-2.87464	-0.027511
C	0.047852	2.8462	-0.260228		C	3.63202	6.08633	-0.0461		C	3.7413	6.16327	-0.051455		C	3.61918	6.17908	-0.226919		C	3.52771	6.13834	-0.096726		C	6.89875	-4.2987	-0.056559		C	6.89875	-4.2987	-0.056559		C	6.89875	-4.2987	-0.056559
C	1.27532	6.39647	0.041037		C	0.049376	7.25651	0.036194		C	0.160696	7.34077	0.023455		C	0.017548	7.2936	-0.214927		C	-0.095769	7.1821	-0.103831		C	8.2	-0.757981	0.006086		C	8.2	-0.757981	0.006086		C	8.2	-0.757981	0.006086
C	1.27764	4.96392	-0.078742		C	1.48574	7.28204	0.014342		C	1.5975	7.3628	-0.00156		C	1.45341	7.33974	-0.233489		C	1.33857	7.25762	-0.100127		C	8.16979	-2.19305	-0.032664		C	8.16979	-2.19305	-0.032664		C	8.16979	-2.19305	-0.032664
C	2.50504	4.26287	-0.136537		C	2.17161	8.52036	0.035674		C	2.28497	8.5999	0.004387		C	2.11884	8.58821	-0.269223		C	1.9807	8.51978	-0.090981		C	9.3829	-2.92308	-0.072767		C	9.3829	-2.92308	-0.072767		C	9.3829	-2.92308	-0.072767
C	2.50516	2.84482	-0.257575		C	3.59501	8.5425	0.012834		C	3.70837	8.61972	-0.020496		C	3.54199	8.63327	-0.288044		C	3.40293	8.59203	-0.08817		C	9.35423	-4.34695	-0.100063		C	9.35423	-4.34695	-0.100063		C	9.35423	-4.34695	-0.100063
C	3.73501	6.39732	0.033535		C	0.011785	9.71431	0.087665		C	0.126874	9.79956	0.04663		C	-0.060983	9.74917	-0.279576		C	-0.220438	9.6361	-0.102778		C	10.6532	-0.805118	-0.074698		C	10.6532	-0.805118	-0.074698		C	10.6532	-0.805118	-0.074698
C	3.73249	4.96469	-0.083771		C	1.44898	9.73596	0.068074		C	1.56374	9.81751	0.021813		C	1.37481	9.79253	-0.299626		C	1.21469	9.70921	-0.096258		C	10.6242	-2.24072	-0.102373		C	10.6242	-2.24072	-0.102373		C	10.6242	-2.24072	-0.102373
C	4.95894	4.2672	-0.148503		C	2.132	10.9732	0.080037		C	2.249	11.0537	0.0136		C	2.03933	11.0403	-0.348363		C	1.85484	10.9703	-0.094411		C	11.8374	-2.97076	-0.152058		C	11.8374	-2.97076	-0.152058		C	11.8374	-2.97076	-0.152058
C	4.96267	2.84644	-0.261591		C	3.55618	10.9985	0.062974		C	3.67374	11.0763	-0.004033		C	3.46358	11.0875	-0.3604		C	3.27697	11.0452	-0.085752		C	11.8094	-4.3952	-0.15932		C	11.8094	-4.3952	-0.15932		C	11.8094	-4.3952	-0.15932
C	6.19013	6.40621	0.021264		C	-0.031718	12.1705	0.12001		C	0.086975	12.2552	0.038892		C	-0.1439	12.2014	-0.373338		C	-0.349462	12.0892	-0.118181		C	13.1061	-0.852447	-0.197197		C	13.1061	-0.852447	-0.197197		C	13.1061	-0.852447	-0.197197
C	6.18689	4.97441	-0.097861		C	1.40522	12.1898	0.105085		C	1.52363	12.2717	0.018365		C	1.29249	12.2442	-0.389565		C	1.08594	12.1604	-0.10542		C	13.0783	-2.28863	-0.193818		C	13.0783	-2.28863	-0.193818		C	13.0783	-2.28863	-0.193818
C	7.41591	4.27512	-0.170749		C	2.09003	13.4273	0.108529		C	2.2119	13.5084	0.000316		C	1.9601	13.4916	-0.446412		C	1.7276	13.4206	-0.110542		C	14.292	-3.01961	-0.222872		C	14.292	-3.01961	-0.222872		C	14.292	-3.01961	-0.222872
C	7.42183	2.85159	-0.271239		C	3.51595	13.4558	0.106203		C	3.63769	13.5339	0.003789		C	3.38442	13.5423	-0.43739		C	3.15047	13.4991	-0.088863		C	14.265	-4.44389	-0.209292		C	14.265	-4.44389	-0.209292		C	14.265	-4.44389	-0.209292
C	-6.1027	2.14855	-0.336502		C	4.43159	-0.04874	-0.192245		C	4.53036	0.025924	-0.144367		C	4.51972	0.058862	-0.099358		C	4.54702	0.035069	-0.102013		C	0.742071	-4.8859	-0.033883		C	0.742071	-4.8859	-0.033883		C	0.742071	-4.8859	-0.033883
C	-6.10209	0.727132	-0.429099		C	5.85447	-0.025958	-0.187591		C	5.95362	0.046225	-0.133707		C	5.94206	0.105099	-0.085024		C	5.96732	0.108558	-0.074429		C	0.714621	-6.30783	-0.022806		C	0.714621	-6.30783	-0.022806		C	0.714621	-6.30783	-0.022806
C	-4.87204	0.021174	-0.493553		C	6.54375	1.2147	-0.177749		C	6.64501	1.28549	-0.134109		C	6.6109	1.35561	-0.125985		C	6.61196	1.37258	-0.077745		C	1.92886	-7.04009	-0.04686		C	1.92886	-7.04009	-0.04686		C	1.92886	-7.04009	-0.04686
C	-4.87206	-1.39744	-0.58755		C	7.96545	1.23655	-0.172094		C	8.06667	1.30495	-0.124402		C	8.03202	1.40098	-0.113695		C	8.0318	1.4452	-0.049355		C	1.90099	-8.46163	-0.041336		C	1.90099	-8.46163	-0.041336		C	1.90099	-8.46163	-0.041336
C	-3.64134	2.14826	-0.335425		C	4.39304	2.41142	-0.146496		C	4.49655	2.48637	-0.119948		C	4.44212	2.51747	-0.158198		C	4.42094	2.49204	-0.106088		C	3.19932	-4.93367	-0.04492		C	3.19932	-4.93367	-0.04492		C	3.19932	-4.93367	-0.04492
C	-3.64194	0.727551	-0.432924		C	5.81664	2.43253	-0.140011		C	5.91981	2.50502	-0.109535		C	5.86415	2.56192	-0.145409		C	5.84212	2.56406	-0.077088		C	3.17123	-6.35584	-0.044556		C	3.17123	-6.35584	-0.044556		C	3.17123	-6.35584	-0.044556
C	-2.41309	0.01997	-0.486619		C	6.50646	3.67204	-0.12368		C	6.61183	3.7434	-0.102934		C	6.53366	3.81202	-0.181256		C	6.48712	3.82749	-0.073535		C	4.38555	-7.08833	-0.062717		C	4.38555	-7.08833	-0.062717		C	4.38555	-7.08833	-0.062717
C	-2.4132	-1.39877	-0.592188		C	7.92846	3.69394	-0.123813		C	8.03403	3.76278	-0.100994		C	7.95506	3.85688	-0.177118		C	7.90701	3.89993	-0.051815		C	4.35737	-8.50996	-0.071501		C	4.35737	-8.50996	-0.071501		C	4.35737	-8.50996	-0.071501
C	-1.18221	2.14211	-0.316819		C	4.35781	4.86879	-0.082266		C	4.46536	4.94405	-0.075338		C	4.3658	4.97367	-0.202592		C	4.29693	4.9474	-0.093323		C	5.65656	-4.98249	-0.049929		C	5.65656	-4.98249	-0.049929		C	5.65656	-4.98249	-0.049929
C	-1.18308	0.725005	-0.432275		C	5.77971	4.89004	-0.08915		C	5.88725	4.96278	-0.08154		C	5.78714	5.01767	-0.205768		C	5.71727	5.01905	-0.077786		C	5.62795	-6.40434	-0.069378		C	5.62795	-6.40434	-0.069378		C	5.62795	-6.40434	-0.069378
C	0.046513	0.016654	-0.475692		C	6.46989	6.12955	-0.06121		C	6.57958	6.20142	-0.065545		C	6.45692	6.26802	-0.233247		C	6.36244	6.28232	-0.062143		C	6.84206	-7.13714	-0.083544		C	6.84206	-7.13714	-0.083544		C	6.84206	-7.13714	-0.083544
C	0.046359	-1.40019	-0.594746		C	7.89169	6.15182	-0.076151		C	8.00126	6.221	-0.079261		C	7.87783	6.31263	-0.243937		C	7.78254	6.35483	-0.054476		C	6.81362	-8.55844	-0.10622		C	6.81362	-8.55844	-0.10622		C	6.81362	-8.55844	-0.10622
C	1.27573	2.13934	-0.306801		C	4.3215	7.32471	-0.015678		C	4.43286	7.40069	-0.034376		C	4.28852	7.42847	-0.253496		C	4.1725	7.40091	-0.078783		C	8.11254	-5.03102	-0.077145		C	8.11254	-5.03102	-0.077145		C	8.11254	-5.03102	-0.077145
C	1.2755	0.722301	-0.429964		C	5.74334	7.34703	-0.036508		C	5.85498	7.42027	-0.055088		C	5.71007	7.47294	-0.269691		C	5.59272	7.47333	-0.07545		C	8.08391	-6.45277	-0.104302		C	8.08391	-6.45277	-0.104302		C	8.08391	-6.45277	-0.104302
C	2.50518	0.015184	-0.473149		C	6.43293	8.5868	-0.003392		C	6.54663	8.65891	-0.035802		C	6.37941	8.72324	-0.293536		C	6.23754	8.7369	-0.055032		C	9.29789	-7.18558	-0.120511		C	9.29789	-7.18558	-0.120511		C	9.29789	-7.18558	-0.120511
C	2.50517	-1.40051	-0.59325		C	7.85378	8.60929	-0.025217		C	7.96757	8.67866	-0.055973		C	7.80006	8.76792	-0.309716		C	7.65714	8.80946	-0.052783		C	9.26953	-8.60686	-0.142787		C	9.26953	-8.60686	-0.142787		C	9.26953	-8.60686	-0.142787
C	3.73475	2.13975	-0.310982		C	4.28346	9.78182	0.038564		C	4.39907	9.85827	-0.010739		C	4.21067	9.88334	-0.320313		C	4.047	9.85494	-0.074268		C	10.568	-5.07923	-0.129347		C	10.568	-5.07923	-0.129347		C	10.568	-5.07923	-0.129347
C	3.73497	0.722241	-0.427881		C	5.7056	9.80459	0.017031		C	5.82118	9.87821	-0.031231		C	5.63209	9.9283	-0.335562		C	5.46746	9.92783	-0.07076		C	10.5396	-6.50109	-0.146835		C	10.5396	-6.50109	-0.146835		C	10.5396	-6.50109	-0.146835
C	4.96404	0.017205	-0.480366		C	6.39414	11.044	0.0446		C	6.512	11.1165	-0.01801		C	6.301	11.1784	-0.364078		C	6.11168	11.1912	-0.056065		C	11.7536	-7.23386	-0.169214		C	11.7536	-7.23386	-0.169214		C	11.7536	-7.23386	-0.169214
C	4.96415	-1.40058	-0.58908		C	7.81552	11.0665	0.028426		C	7.93368	11.1363	-0.031342		C	7.72216	11.2234	-0.373222		C	7.53134	11.2639	-0.047504		C	11.7256	-8.65532	-0.177741		C	11.7256	-8.65532	-0.177741		C	11.7256	-8.65532	-0.177741
C	6.19271	2.14305	-0.32502		C	4.24411	12.2389	0.078617		C	4.36401	12.3152	-0.004142		C	4.13205	12.3374	-0.400413		C	3.92084	12.3089	-0.081226		C	13.0232	-5.1276	-0.189645		C	13.0232	-5.1276	-0.189645		C	13.0232	-5.1276	-0.189645
C	6.19365	0.724799	-0.426497		C	5.66593	12.262	0.069681		C	5.78588	12.3357	-0.009826		C	5.55345	12.3835	-0.401298		C	5.34093	12.3823	-0.065782		C	12.9955	-6.54952	-0.187463		C	12.9955	-6.54952	-0.187463		C	12.9955	-6.54952	-0.187463
C	7.42355	0.020252	-0.490307		C	6.35419	13.502	0.08527		C	6.47666	13.5748	-0.007426		C	6.22222	13.6339	-0.439484		C	5.98494	13.6457	-0.063165		C	14.2095	-7.2821	-0.214502		C	14.2095	-7.2821	-0.214502		C	14.2095	-7.2821	-0.214502
C	7.42368	-1.39916	-0.585952		C	7.77648	13.5243	0.083405		C	7.89886	13.5945	-0.005075		C	7.64349	13.6794	-0.433531		C	7.40506	13.7186	-0.041025		C	14.1818	-8.70354	-0.208554		C	14.1818	-8.70354	-0.208554		C	14.1818	-8.70354	-0.208554
C	-6.10174	-2.10405	-0.649653		C	8.69349	0.018792	-0.209658		C	8.79253	0.08575	-0.147233		C	8.77934	0.195256	-0.092124		C	8.80261	0.253912	-0.051138		C	0.658813	-9.14601	-0.040908		C	0.658813	-9.14601	-0.040908		C	0.658813	-9.14601	-0.040908
C	-6.10167	-3.52371	-0.745945		C	10.1159	0.040858	-0.208653		C	10.2151	0.105325	-0.142533		C	10.2013	0.24058	-0.08445		C	10.2229	0.326603	-0.026382		C	0.630887	-10.5681	-0.037071		C	0.630887	-10.5681	-0.037071		C	0.630887	-10.5681	-0.037071
C	-4.87207	-4.22918	-0.806234		C	10.8048	1.28096	-0.193585		C	10.9061	1.34415	-0.139315		C	10.8699	1.49072	-0.122899		C	10.8673	1.59021	-0.024973		C	1.84491	-11.3	-0.063367		C	1.84491	-11.3	-0.063367		C	1.84491	-11.3	-0.063367
C	-4.87205	-5.64983	-0.908581		C	12.2291	1.30305	-0.196187		C	12.3305	1.36374	-0.138877		C	12.2938	1.53597	-0.119425		C	12.2899	1.66294	-0.004027		C	1.81686	-12.7244	-0.066114		C	1.81686	-12.7244	-0.066114		C	1.81686	-12.7244	-0.066114
C	-3.64233	-2.10422	-0.648141		C	8.65525	2.47654	-0.159907		C	8.75874	2.54387	-0.123045		C	8.70164	2.65125	-0.154137		C	8.6769	2.70868	-0.050381		C	3.1151	-9.19417	-0.066771		C	3.1151	-9.19417	-0.066771		C	3.1151	-9.19417	-0.066771
C	-3.64238	-3.52349	-0.748834		C	10.078	2.49852	-0.158231		C	10.1813	2.56334	-0.118528		C	10.1234	2.69644	-0.147136		C	10.0976	2.78135	-0.026087		C	3.08709	-10.6163	-0.068662		C	3.08709	-10.6163	-0.068662		C	3.08709	-10.6163	-0.068662
C	-2.4133	-4.22945	-0.803739		C	10.7669	3.73815	-0.141297		C	10.8725	3.80181	-0.113191		C	10.7923	3.94646	-0.183895		C	10.742	4.04472	-0.022048		C	4.30118	-11.3483	-0.091087		C	4.30118	-11.3483	-0.091087		C	4.30118	-11.3483	-0.091087
C	-2.41318	-5.65037	-0.910861		C	12.1915	3.76044	-0.146359		C	12.2972	3.82153	-0.115765		C	12.2164	3.99166	-0.183568		C	12.1647	4.11755	-0.004092		C	4.27304	-12.7727	-0.099195		C	4.27304	-12.7727	-0.099195		C	4.27304	-12.7727	-0.099195
C	-1.18356	-2.10641	-0.640991		C	8.61851	4.93395	-0.10299		C	8.72613	5.00157	-0.091538		C	8.62466	5.10711	-0.210296		C	8.55227	5.16361	-0.043295		C	5.57153	-9.24268	-0.089026		C	5.57153	-9.24268	-0.089026		C	5.57153	-9.24268	-0.089026
C	-1.18353	-3.52371	-0.75323		C	10.0403	4.95612	-0.110816		C	10.148	5.02118	-0.097457		C	10.046	5.15204	-0.213655		C	9.9725	5.23616	-0.028951		C	5.5433	-10.6646	-0.10357		C	5.5433	-10.6646	-0.10357		C	5.5433	-10.6646	-0.10357
C	0.046183	-4.23053	-0.800498		C	10.7294	6.19589	-0.086408		C	10.8393	6.25996	-0.085035		C	10.715	6.40244	-0.243728		C	10.6169	6.49962	-0.01709		C	6.75744	-11.3969	-0.119889		C	6.75744	-11.3969	-0.119889		C	6.75744	-11.3969	-0.119889
C	0.04615	-5.65083	-0.91268		C	12.154	6.21817	-0.097255		C	12.2638	6.27958	-0.093612		C	12.1389	6.44738	-0.249203		C	12.0397	6.57234	-0.004743		C	6.72918	-12.8212	-0.133479		C	6.72918	-12.8212	-0.133479		C	6.72918	-12.8212	-0.133479
C	1.27539	-2.1074	-0.636549		C	8.58109	7.39115	-0.045113		C	8.69282	7.4593	-0.060742		C	8.54714	7.56289	-0.26839		C	8.42723	7.61817	-0.03601		C	8.0277	-9.29125	-0.118787		C	8.0277	-9.29125	-0.118787		C	8.0277	-9.29125	-0.118787
C	1.27546	-3.52482	-0.754606		C	10.003	7.4136	-0.062568		C	10.1149	7.47904	-0.076223		C	9.9687	7.60762	-0.280674		C	9.8475	7.6908	-0.030229		C	7.99939	-10.7131	-0.139167		C	7.99939	-10.7131	-0.139167		C	7.99939	-10.7131	-0.139167
C	2.50515	-4.23127	-0.799726		C	10.6919	8.65343	-0.033145		C	10.8059	8.71774	-0.059354		C	10.6374	8.85802	-0.306337		C	10.4917	8.95437	-0.013782		C	9.21349	-11.4453	-0.153641		C	9.21349	-11.4453	-0.153641		C	9.21349	-11.4453	-0.153641
C	2.50517	-5.65089	-0.912323		C	12.116	8.67577	-0.046787		C	12.2301	8.73743	-0.070487		C	12.0611	8.90298	-0.31407		C	11.9143	9.0271	-0.003643		C	9.1853	-12.8696	-0.167284		C	9.1853	-12.8696	-0.167284		C	9.1853	-12.8696	-0.167284
C	3.73502	-2.10727	-0.638169		C	8.54296	9.8489	0.007177		C	8.65902	9.91737	-0.036918		C	8.46929	10.0185	-0.333165		C	8.30161	10.0729	-0.033619		C	10.4836	-9.33966	-0.157892		C	10.4836	-9.33966	-0.157892		C	10.4836	-9.33966	-0.157892
C	3.73494	-3.52499	-0.752094		C	9.96507	9.87131	-0.010782		C	10.0811	9.93706	-0.052243		C	9.89076	10.0633	-0.344884		C	9.72209	10.1455	-0.027347		C	10.4555	-10.7616	-0.172819		C	10.4555	-10.7616	-0.172819		C	10.4555	-10.7616	-0.172819
C	4.96424	-4.23041	-0.802047		C	10.6534	11.1109	0.016979		C	10.7717	11.1755	-0.03726		C	10.5592	11.3136	-0.371982		C	10.3659	11.4089	-0.013229		C	11.6696	-11.4937	-0.191111		C	11.6696	-11.4937	-0.191111		C	11.6696	-11.4937	-0.191111
C	4.96423	-5.65105	-0.910175		C	12.0778	11.1332	0.005608		C	12.1962	11.1953	-0.045673		C	11.9832	11.3587	-0.376942		C	11.7886	11.4817	-0.000317		C	11.6415	-12.918	-0.19948		C	11.6415	-12.918	-0.19948		C	11.6415	-12.918	-0.19948
C	6.19404	-2.10606	-0.645191		C	8.50439	12.3066	0.052942		C	8.62475	12.3752	-0.019948		C	8.39101	12.4739	-0.403483		C	8.17572	12.5276	-0.03698		C	12.9396	-9.3879	-0.200967		C	12.9396	-9.3879	-0.200967		C	12.9396	-9.3879	-0.200967
C	6.19394	-3.52413	-0.747515		C	9.92619	12.3288	0.043956		C	10.0466	12.3948	-0.025478		C	9.8124	12.519	-0.405557		C	9.59593	12.6002	-0.021259		C	12.9117	-10.8099	-0.203226		C	12.9117	-10.8099	-0.203226		C	12.9117	-10.8099	-0.203226
C	7.42372	-4.22933	-0.805362		C	10.6146	13.5688	0.064485		C	10.7373	13.6338	-0.017428		C	10.4809	13.7694	-0.439152		C	10.2398	13.8637	-0.014812		C	14.1258	-11.5418	-0.227715		C	14.1258	-11.5418	-0.227715		C	14.1258	-11.5418	-0.227715
C	7.42355	-5.65055	-0.908243		C	12.0394	13.5909	0.058832		C	12.162	13.6533	-0.019829		C	11.9049	13.8145	-0.438266		C	11.6627	13.9364	0.003737		C	14.0977	-12.9662	-0.230503		C	14.0977	-12.9662	-0.230503		C	14.0977	-12.9662	-0.230503
C	-4.87234	7.09704	0.123606		C	-0.557482	1.10356	-0.128387		C	-0.456602	1.18789	-0.141324		C	-0.485967	1.13061	-0.16391		C	-0.478938	1.00971	-0.160221		C	2.06394	0.05037	-0.103772		C	2.06394	0.05037	-0.103772		C	2.06394	0.05037	-0.103772
H	-4.87212	8.17951	0.218189		H	-1.64296	1.08527	-0.114225		H	-1.54157	1.17303	-0.145969		H	-1.57034	1.09672	-0.174657		H	-1.5628	0.952587	-0.171382		H	2.08281	1.13564	-0.138271		H	2.08281	1.13564	-0.138271		H	2.08281	1.13564	-0.138271
C	-6.10163	-6.35344	-0.963185		C	12.9538	0.085249	-0.22743		C	13.053	0.144527	-0.155327		C	13.038	0.330412	-0.090691		C	13.0575	0.471597	0.000985		C	0.574835	-13.4058	-0.056199		C	0.574835	-13.4058	-0.056199		C	0.574835	-13.4058	-0.056199
C	-6.10157	-7.78595	-1.07081		C	14.3899	0.107685	-0.234897		C	14.4893	0.164353	-0.159896		C	14.4737	0.375916	-0.091667		C	14.4918	0.544966	0.017622		C	0.546494	-14.8419	-0.062936		C	0.546494	-14.8419	-0.062936		C	0.546494	-14.8419	-0.062936
C	-4.87205	-8.46531	-1.12229		C	15.0523	1.34709	-0.21289		C	15.1538	1.40267	-0.150036		C	15.116	1.62532	-0.123636		C	15.1096	1.8071	0.026278		C	1.76113	-15.5475	-0.082519		C	1.76113	-15.5475	-0.082519		C	1.76113	-15.5475	-0.082519
H	-4.87205	-9.5493	-1.20513		H	16.1393	1.36403	-0.219651		H	16.2408	1.41767	-0.154738		H	16.2025	1.65973	-0.125247		H	16.1952	1.8626	0.038118		H	1.73972	-16.6343	-0.088487		H	1.73972	-16.6343	-0.088487		H	1.73972	-16.6343	-0.088487
C	-2.40026	7.08709	0.101675		C	-0.588366	3.56963	-0.066649		C	-0.482791	3.65399	-0.05812		C	-0.557923	3.59564	-0.172859		C	-0.600302	3.47195	-0.139892		C	4.52921	0.002041	0.003031		C	4.52921	0.002041	0.003031		C	4.52921	0.002041	0.003031
H	-2.39408	8.17078	0.186788		H	-1.67411	3.55345	-0.05212		H	-1.56871	3.63851	-0.044793		H	-1.64327	3.55834	-0.160411		H	-1.68453	3.41366	-0.143499		H	4.55067	1.08979	-0.018066		H	4.55067	1.08979	-0.018066		H	4.55067	1.08979	-0.018066
C	-3.64245	-6.35342	-0.963615		C	12.9156	2.54282	-0.176604		C	13.0192	2.60245	-0.131268		C	12.9603	2.78615	-0.153716		C	12.9319	2.92625	0.002328		C	3.03099	-13.4541	-0.08782		C	3.03099	-13.4541	-0.08782		C	3.03099	-13.4541	-0.08782
C	-3.64251	-7.78586	-1.07159		C	14.352	2.5652	-0.183935		C	14.4555	2.62222	-0.13585		C	14.3959	2.8316	-0.154788		C	14.3664	2.99961	0.018998		C	3.00264	-14.8901	-0.095351		C	3.00264	-14.8901	-0.095351		C	3.00264	-14.8901	-0.095351
C	-2.41322	-8.46515	-1.12371		C	15.0143	3.80445	-0.162585		C	15.12	3.8604	-0.126689		C	15.0383	4.0809	-0.187644		C	14.9843	4.26165	0.026911		C	4.21723	-15.5958	-0.115784		C	4.21723	-15.5958	-0.115784		C	4.21723	-15.5958	-0.115784
H	-2.41342	-9.54917	-1.20643		H	16.1013	3.8213	-0.169265		H	16.207	3.87525	-0.131384		H	16.1248	4.11515	-0.189271		H	16.0698	4.31703	0.038864		H	4.19572	-16.6826	-0.121915		H	4.19572	-16.6826	-0.121915		H	4.19572	-16.6826	-0.121915
C	0.054476	7.07693	0.100977		C	-0.615017	6.02362	0.01494		C	-0.50571	6.10816	0.013935		C	-0.626675	6.04803	-0.18537		C	-0.715786	5.92414	-0.111645		C	6.98668	-0.050616	0.039168		C	6.98668	-0.050616	0.039168		C	6.98668	-0.050616	0.039168
H	0.05783	8.16067	0.188257		H	-1.70178	6.00796	0.02879		H	-1.59246	6.09424	0.02964		H	-1.71279	6.01401	-0.172039		H	-1.80125	5.86918	-0.116461		H	7.00972	1.03551	0.067098		H	7.00972	1.03551	0.067098		H	7.00972	1.03551	0.067098
C	-1.1836	-6.35407	-0.96377		C	12.8781	5.00031	-0.125566		C	12.9859	5.06022	-0.107027		C	12.8828	5.24178	-0.21701		C	12.8067	5.38098	0.003695		C	5.48717	-13.5025	-0.119671		C	5.48717	-13.5025	-0.119671		C	5.48717	-13.5025	-0.119671
C	-1.18359	-7.78592	-1.07281		C	14.3141	5.0227	-0.133792		C	14.4219	5.08002	-0.112676		C	14.3183	5.28723	-0.219145		C	14.241	5.45429	0.019456		C	5.45878	-14.9385	-0.128599		C	5.45878	-14.9385	-0.128599		C	5.45878	-14.9385	-0.128599
C	0.045912	-8.46556	-1.12502		C	14.9766	6.26207	-0.112836		C	15.0866	6.31833	-0.104047		C	14.9608	6.53661	-0.252692		C	14.859	6.71637	0.027033		C	6.67335	-15.6443	-0.14962		C	6.67335	-15.6443	-0.14962		C	6.67335	-15.6443	-0.14962
H	0.04551	-9.54958	-1.20771		H	16.0635	6.27879	-0.119473		H	16.1736	6.33307	-0.108748		H	16.0473	6.57082	-0.254298		H	15.9446	6.77168	0.039064		H	6.65177	-16.7311	-0.155753		H	6.65177	-16.7311	-0.155753		H	6.65177	-16.7311	-0.155753
C	2.50485	7.07553	0.094783		C	-0.650813	8.47563	0.074858		C	-0.537556	8.56063	0.051345		C	-0.703162	8.49952	-0.234236		C	-0.839152	8.37527	-0.103249		C	9.4407	-0.09873	-0.006052		C	9.4407	-0.09873	-0.006052		C	9.4407	-0.09873	-0.006052
H	2.5047	8.15952	0.180101		H	-1.7377	8.4586	0.087554		H	-1.62441	8.54552	0.067526		H	-1.78942	8.46508	-0.219821		H	-1.92469	8.31999	-0.108815		H	9.46325	0.986251	0.040147		H	9.46325	0.986251	0.040147		H	9.46325	0.986251	0.040147
C	1.27543	-6.35439	-0.963607		C	12.8404	7.45779	-0.074247		C	12.9524	7.51809	-0.082892		C	12.8052	7.69751	-0.280803		C	12.6815	7.83565	0.00533		C	7.94331	-13.5509	-0.152639		C	7.94331	-13.5509	-0.152639		C	7.94331	-13.5509	-0.152639
C	1.27549	-7.78668	-1.07331		C	14.2765	7.48026	-0.083461		C	14.3886	7.53793	-0.089538		C	14.2409	7.74295	-0.283826		C	14.1159	7.90901	0.020222		C	7.91491	-14.9869	-0.162087		C	7.91491	-14.9869	-0.162087		C	7.91491	-14.9869	-0.162087
C	2.50516	-8.46605	-1.12493		C	14.9389	8.71979	-0.062267		C	15.0531	8.77636	-0.080764		C	14.8831	8.99241	-0.317215		C	14.7338	9.17122	0.028173		C	9.12951	-15.6927	-0.182834		C	9.12951	-15.6927	-0.182834		C	9.12951	-15.6927	-0.182834
H	2.50515	-9.55005	-1.20768		H	16.0258	8.73675	-0.068926		H	16.1401	8.79137	-0.085466		H	15.9696	9.02688	-0.318785		H	15.8193	9.2267	0.040175		H	9.10799	-16.7795	-0.188809		H	9.10799	-16.7795	-0.188809		H	9.10799	-16.7795	-0.188809
C	4.95561	7.07853	0.085156		C	-0.690579	10.9266	0.115876		C	-0.573179	11.0133	0.060057		C	-0.782894	10.9514	-0.311383		C	-0.9656	10.8246	-0.111781		C	11.8938	-0.146086	-0.124611		C	11.8938	-0.146086	-0.124611		C	11.8938	-0.146086	-0.124611
H	4.95202	8.16252	0.169707		H	-1.77744	10.9078	0.125318		H	-1.6599	10.9971	0.075431		H	-1.86908	10.9169	-0.297691		H	-2.05104	10.7683	-0.120798		H	11.9151	0.940389	-0.110052		H	11.9151	0.940389	-0.110052		H	11.9151	0.940389	-0.110052
C	3.73492	-6.35445	-0.96317		C	12.8023	9.91556	-0.022792		C	12.9186	9.97619	-0.058957		C	12.7273	10.1533	-0.34471		C	12.556	10.2905	0.007325		C	10.3994	-13.5994	-0.186281		C	10.3994	-13.5994	-0.186281		C	10.3994	-13.5994	-0.186281
C	3.73486	-7.78672	-1.07255		C	14.2385	9.93799	-0.032132		C	14.3548	9.99598	-0.065592		C	14.1629	10.1988	-0.347637		C	13.9904	10.3638	0.022186		C	10.3711	-15.0353	-0.194957		C	10.3711	-15.0353	-0.194957		C	10.3711	-15.0353	-0.194957
C	4.96443	-8.46567	-1.12349		C	14.9005	11.1775	-0.010292		C	15.019	11.2344	-0.056137		C	14.805	11.4482	-0.380183		C	14.608	11.626	0.030865		C	11.5857	-15.7411	-0.214851		C	11.5857	-15.7411	-0.214851		C	11.5857	-15.7411	-0.214851
H	4.96479	-9.54968	-1.20635		H	15.9875	11.1947	-0.01702		H	16.106	11.2496	-0.060846		H	15.8915	11.4829	-0.381747		H	15.6936	11.6818	0.042754		H	11.5643	-16.8278	-0.22066		H	11.5643	-16.8278	-0.22066		H	11.5643	-16.8278	-0.22066
C	7.41116	7.08922	0.07783		C	-0.737518	13.3802	0.139512		C	-0.617781	13.4681	0.035206		C	-0.870653	13.4026	-0.420863		C	-1.09807	13.2745	-0.135987		C	14.3472	-0.194009	-0.255085		C	14.3472	-0.194009	-0.255085		C	14.3472	-0.194009	-0.255085
H	7.40518	8.17289	0.163738		H	-1.82409	13.3621	0.144107		H	-1.7037	13.4534	0.047934		H	-1.95598	13.3726	-0.406752		H	-2.18331	13.2209	-0.148474		H	14.3716	0.892304	-0.264049		H	14.3716	0.892304	-0.264049		H	14.3716	0.892304	-0.264049
C	6.19396	-6.35414	-0.963022		C	12.7639	12.3732	0.02851		C	12.8845	12.4341	-0.035171		C	12.6492	12.609	-0.408312		C	12.4302	12.7452	0.009335		C	12.8556	-13.6476	-0.219722		C	12.8556	-13.6476	-0.219722		C	12.8556	-13.6476	-0.219722
C	6.19393	-7.78605	-1.07127		C	14.1999	12.3956	0.020022		C	14.3205	12.4539	-0.040788		C	14.0847	12.6545	-0.410248		C	13.8645	12.8185	0.025064		C	12.8273	-15.0836	-0.226997		C	12.8273	-15.0836	-0.226997		C	12.8273	-15.0836	-0.226997
C	7.42357	-8.4653	-1.12216		C	14.862	13.635	0.042265		C	14.9849	13.6923	-0.030792		C	14.7268	13.904	-0.442089		C	14.4821	14.0807	0.034096		C	14.042	-15.7893	-0.246312		C	14.042	-15.7893	-0.246312		C	14.042	-15.7893	-0.246312
H	7.42373	-9.5493	-1.20507		H	15.949	13.6522	0.035484		H	16.0719	13.7074	-0.035501		H	15.8133	13.9385	-0.443685		H	15.5677	14.1364	0.045898		H	14.0206	-16.8761	-0.252112		H	14.0206	-16.8761	-0.252112		H	14.0206	-16.8761	-0.252112
Li	-4.89255	5.78486	1.87884		Li	0.748454	1.1299	1.71867		Li	0.827204	1.18678	1.7221		Li	0.799373	1.14009	1.73308		Li	0.816224	1.16639	1.74921		Li	2.87779	0.021306	1.89881		Li	2.87779	0.021306	1.89881		Li	2.87779	0.021306	1.89881
C	-6.58319	5.38509	3.59057		C	-0.48749	0.242033	3.618		C	-0.460168	-0.076123	3.29082		C	-0.504436	-0.148739	3.25397		C	-0.576131	0.247023	3.58331		C	-2.65812	2.97437	3.38176		C	-1.56002	-2.74939	4.72007		C	-1.5416	-2.68975	4.70284
C	-5.99908	4.13474	3.36823		C	0.830424	0.396107	4.0719		C	0.805668	-0.049322	3.86919		C	0.735169	-0.080194	3.88126		C	0.702031	0.521885	4.08796		C	-2.56914	1.60373	3.60518		C	-0.539742	-3.54776	4.18706		C	-0.522807	-3.51001	4.31551
C	-4.62564	3.92842	3.56522		C	1.49749	1.62824	4.06719		C	1.4473	1.16288	4.1885		C	1.34753	1.13086	4.26049		C	1.32152	1.78724	4.05694		C	-0.2334	1.58427	3.12653		C	0.509421	-1.65811	3.14538		C	0.518254	-1.67964	3.17141
C	-3.84753	5.02407	3.97678		C	0.831992	2.77029	3.61636		C	0.76844	2.36264	3.90038		C	0.615458	2.30762	3.94724		C	0.600184	2.86852	3.55941		C	-1.48663	3.63396	3.04986		C	-1.50546	-1.38095	4.44975		C	-1.45549	-1.38791	4.43755
C	-4.42596	6.27429	4.20694		C	-0.474763	2.66564	3.1507		C	-0.497799	2.3652	3.32236		C	-0.614162	2.28675	3.30346		C	-0.669611	2.66917	3.03202		H	-3.59938	3.49963	3.46566		H	-2.36384	-3.18044	5.31546		H	-2.36334	-3.14515	5.26934
C	-5.79904	6.45986	4.01603		C	-1.11132	1.41254	3.11307		C	-1.098	1.13893	3.00259		C	-1.17139	1.05611	2.9432		C	-1.21982	1.36804	2.97648		N	-3.84268	0.972743	3.97435		N	-0.634372	-4.98693	4.54265		N	-0.63213	-4.84345	4.59597
C	-3.99929	2.58313	3.3443		C	-1.12206	-1.11706	3.69597		C	2.79871	1.17531	4.83886		C	2.68813	1.10963	4.93157		C	-1.17455	-1.13059	3.63009		O	-3.83021	0.11264	4.83811		O	0.42033	-5.59329	4.78189		O	0.446774	-5.52229	4.72804
H	-4.66486	1.91791	2.79104		H	-0.450974	-1.80109	4.22079		H	3.39077	0.302892	4.55088		H	3.1242	0.111161	4.85116		H	-0.557582	-1.80632	4.21594		O	-4.84474	1.38167	3.4068		O	-1.77281	-5.47402	4.61452		O	-1.7243	-5.42846	4.63868
H	-3.06345	2.66709	2.78506		H	-1.33462	-1.51887	2.70391		H	3.36247	2.07395	4.57581		H	3.38279	1.83126	4.49438		H	-1.30827	-1.52142	2.62115		N	1.01405	0.999902	2.93684		N	1.50172	-1.00415	2.38671		N	1.46691	-1.00933	2.39795
H	-3.76849	2.10923	4.30485		H	-2.07656	-1.07471	4.22448		H	2.70023	1.15837	5.93084		H	2.60163	1.37166	5.98973		H	-2.17073	-1.08607	4.07428		O	1.96918	1.69524	2.41223		O	1.34544	0.246713	2.06144		O	1.36839	0.241476	2.04634
H	-7.64249	5.52449	3.40065		H	2.52182	1.68923	4.41915		H	-0.94658	-1.00326	3.01369		H	-0.952929	-1.09033	2.96494		N	1.53398	-0.536867	4.67213		O	1.28064	-0.224979	3.23337		O	2.58653	-1.59188	1.99805		O	2.58329	-1.58348	1.8266
H	-3.80218	7.1067	4.51725		H	-1.01277	3.52191	2.766		H	-1.01272	3.28366	3.06884		N	1.12022	3.63645	4.30433		O	2.68035	-0.609864	4.25455		N	-1.53062	5.07982	2.8206		N	-2.55951	-0.497601	5.00077		N	-2.506	-0.539041	4.77862
H	-6.24759	7.43474	4.17558		N	-2.42865	1.38477	2.50053		N	-2.37033	1.12817	2.32226		O	0.739529	4.58393	3.63478		O	1.05568	-1.2322	5.55039		O	-2.61088	5.63269	2.95065		O	-3.43788	-1.03085	5.69546		O	-3.42672	-1.03416	5.79728
H	-2.77679	4.89574	4.10865		O	-2.98924	0.299482	2.36156		O	-2.8545	0.031941	2.04039		O	1.87553	3.71011	5.26152		H	2.32819	1.8925	4.44247		O	-0.490015	5.63449	2.50994		O	-2.49492	0.710558	4.72979		O	-2.47579	0.75246	4.64112
H	-6.61401	3.3135	3.01189		O	-2.90593	2.46073	2.1452		O	-2.88794	2.21582	2.06797		H	-1.12152	3.20923	3.04989		H	-1.24748	3.48024	2.61229		C	-0.283958	2.97449	2.91902		C	-0.498345	-0.820733	3.67793		C	-0.548481	-0.866502	3.82326
Tv	14.7544	1.1e-05	-0.01335		H	1.32941	3.73427	3.6081		H	1.24794	3.31147	4.12366		N	-2.40522	1.03013	2.22119		N	-2.46407	1.24818	2.25987		H	0.61747	3.50935	2.65493		H	-0.476032	0.250056	3.48019		H	-0.482548	0.275761	3.54646
					H	1.34554	-0.483937	4.44543		H	1.31427	-0.988356	4.06813		O	-2.85229	-0.079123	1.90699		O	-2.95367	0.129455	2.0754		C	-1.4002	0.841376	3.48316		C	0.509464	-3.07898	3.36606		C	0.559718	-3.0991	3.33592
					Tv	-0.22832	14.7453	0.306893		Tv	-0.202742	14.7473	0.143971		O	-2.93879	2.11062	1.94607		O	-2.97332	2.29519	1.84407		C	-1.39807	-0.651641	3.62703		C	1.48446	-4.02004	2.70871		C	1.55447	-4.04528	2.68155
															H	1.26533	-1.00528	4.08868		H	1.03601	3.86179	3.56028		H	-0.990475	-0.942038	4.59991		H	2.41878	-4.08792	3.28983		H	2.43876	-4.09255	3.29743
															Tv	-0.467059	14.7342	-0.380815		Tv	-0.75315	14.7282	0.01005		H	-2.40308	-1.06101	3.55254		H	1.07286	-5.03369	2.63106		H	1.02269	-5.09344	2.65294
																									H	-0.753274	-1.09785	2.87279		H	1.75438	-3.65157	1.71487		H	1.7319	-3.85661	1.77921
																									Tv	14.737	-0.289956	-0.195877		Tv	14.737	-0.289956	-0.195877		Tv	14.737	-0.289956	-0.195877
